# Supplementary material
Source: PubMed Central journal article supplement (PMC3400988)
Supplement: 97320630008589S1.pdf [file 97320630008589S1.pdf]

## Supplementary material:

**Table 1:** Results from docking analysis of the three bacteriocins Lsl\_003, Lsl\_0554, and Lsl\_0510. Table depicts the Hex E-total score for each of the bacteriocin against the chosen cancer targets along with the sub cellular localization of all the three bacteriocins as predicted by BaCelLo.

| Name of the Bacteriocin | Sub - Cellular Localization | Docking Results |        |                   |
|-------------------------|-----------------------------|-----------------|--------|-------------------|
|                         |                             | Rb1             | p53    | Androgen receptor |
| Lsl_003                 | Nucleus                     | -1.2            | -0.51  | -520.09           |
| Lsl_0510                | Cytoplasm                   | -46.93          | -57.85 | -593.96           |
| Lsl_0554                | Secretory                   | -49.07          | -1.20  | -516.61           |
